# Supplementary material for: Electrospun artificial periosteum loaded with DFO contributes to osteogenesis via the TGF-β1/Smad2 pathway
Source: Royal Society of Chemistry journal article supplement (doi:10.1039/d0bm01304h), 2020-12-21
Supplement: d0bm01304h1.pdf [file d0bm01304h1.pdf]

## **Electrospun Artificial Periosteum loaded with DFO Contributes to Osteogenesis via the TGF- $\beta$ 1/Smad2 Pathway**

Rui Shi<sup>a</sup>, Jingshuang Zhang<sup>a</sup>, Kun Niu<sup>b</sup>, Weiyang Li<sup>a</sup>, Ni Jiang<sup>b</sup>, Jianlin Li<sup>b</sup>, Qingsong Yu<sup>b,\*</sup>, Chengai Wu<sup>a,\*</sup>

a. Beijing Institute of Traumatology and Orthopaedics, Beijing Jishuitan Hospital, Beijing 100035 China

b. Beijing Laboratory of Biomedical Materials, Beijing University of Chemical Technology, Beijing 100029, China

\*Corresponding authors: Chengai Wu (wuchengai@jst-hosp.com.cn) and Qingsong Yu (yuqs@mail.buct.edu.cn)

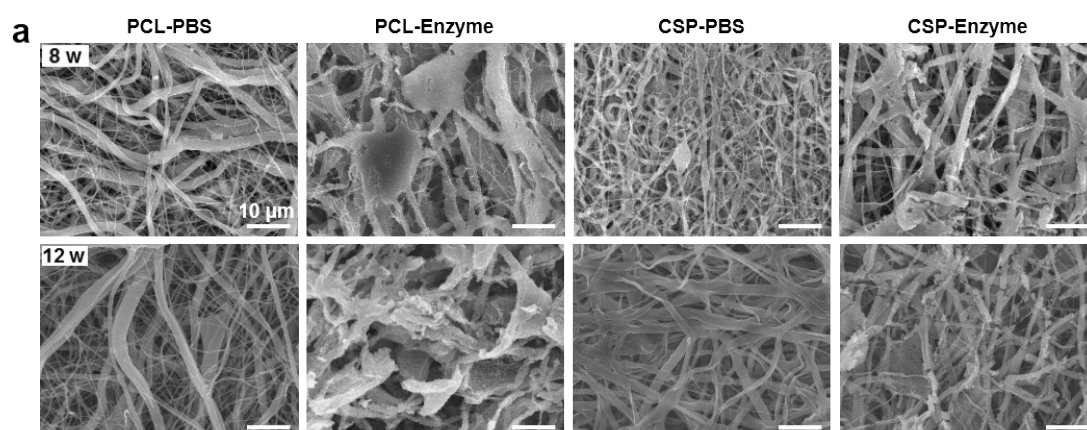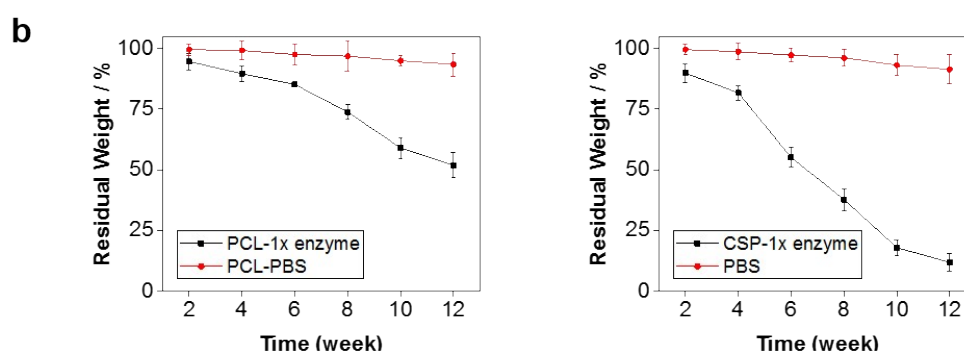

**Figure S1. Properties of the artificial periosteum.** a. Representative SEM micrographs of various membranes after degradation for 8 and 12 weeks in PBS or 1× enzyme solution (5 μg/mL). b. Mass loss curves of the artificial periosteum. n = 3

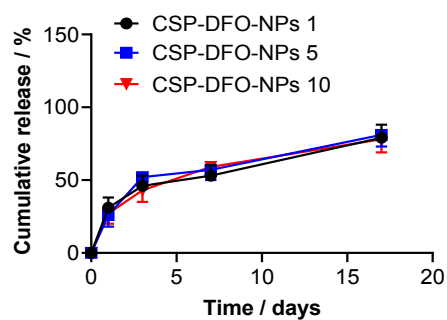

**Figure S2. The influence of drug loading content on the drug release profiles of the artificial periosteum.** 1.0g of DFO 1, DFO 5 and DFO 10 which contains 6.6, 32.8 and 65.7 mg of DFO were used for the drug release study with 10× lipase solution. n=3
